# Supplementary material for: Facile synthesis of thermo-responsive episulfide group-containing diblock copolymers as robust protecting ligands of gold nanoparticles for catalytic applications
Source: Royal Society of Chemistry journal article supplement (doi:10.1039/c6ra02885c), 2016-01-01
Supplement: c6ra02885c1.pdf [file c6ra02885c1.pdf]

Supporting Information for *RSC Advances*

## Electronic Supporting Information

### Facile synthesis of thermo-responsive episulfide group-containing diblock copolymers as robust protecting ligands of gold nanoparticles for catalytic applications

Dongmei Wang, Bingxin Liu, Jianhua Lü and Changli Lü\*

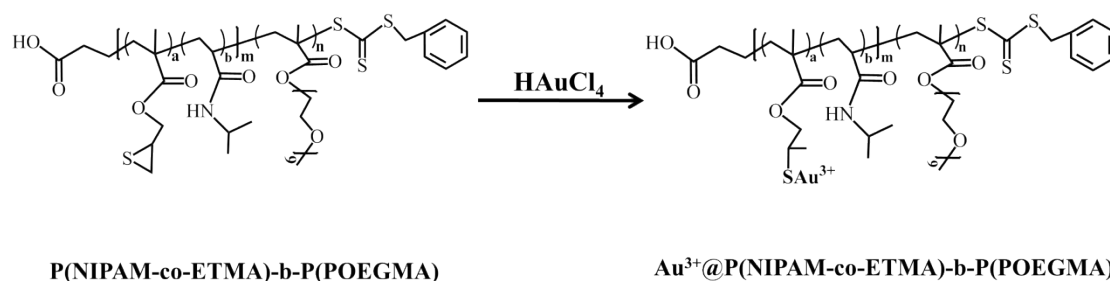

Scheme S1 Schematic illustration of Au<sup>3+</sup> induced episulfide opening reaction.

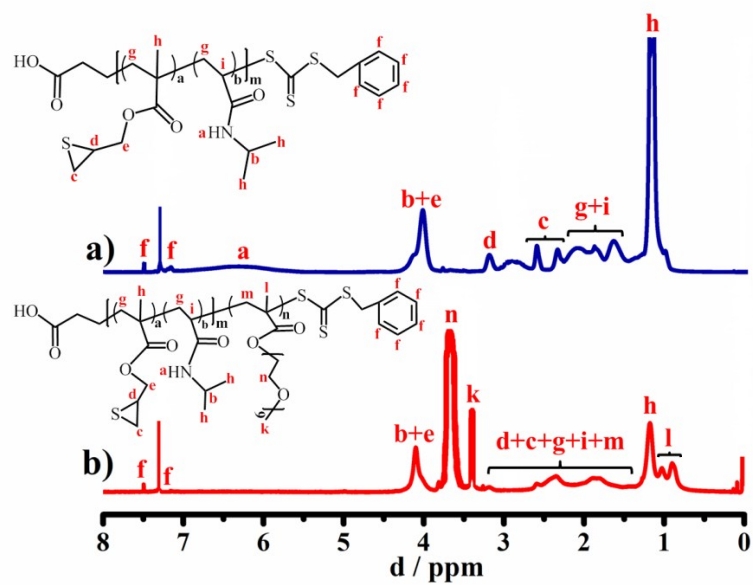

Fig. S1  $^1\text{H}$  NMR spectrum of A2-CTA (a) and P 2 (b) (500 MHz,  $\text{CDCl}_3$ ).

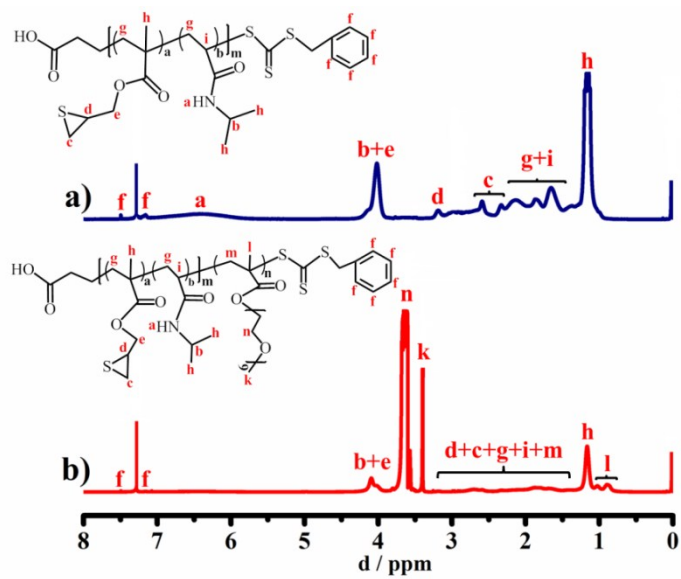

Fig. S2  $^1\text{H}$  NMR spectrum of A3-CTA (a) and P 3 (b) (500 MHz,  $\text{CDCl}_3$ ).

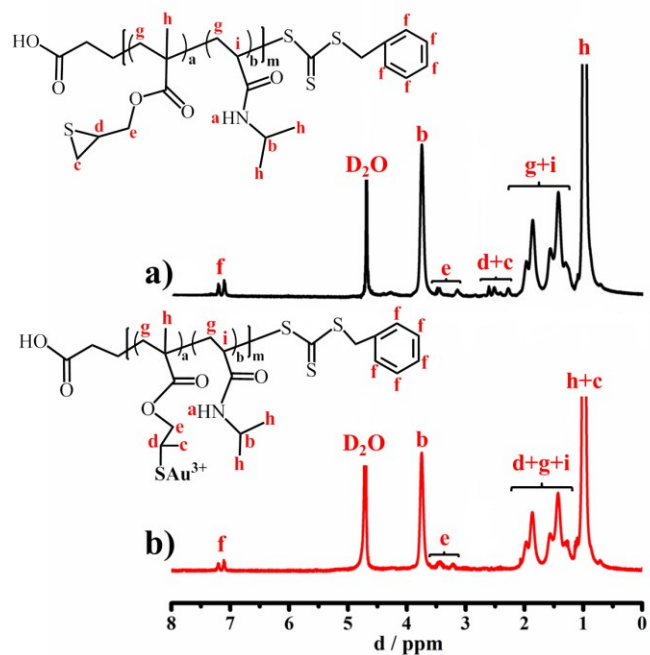

Fig. S3 <sup>1</sup>H NMR spectrum of A1-CTA (a) and Au<sup>3+</sup>@A1-CTA (b) (500 MHz, D<sub>2</sub>O)

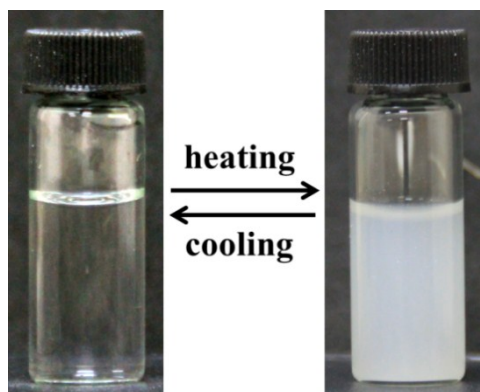

Fig. S4 Digital photographs of P1 aqueous solution upon different temperatures (sample concentration: 12 mg/mL).

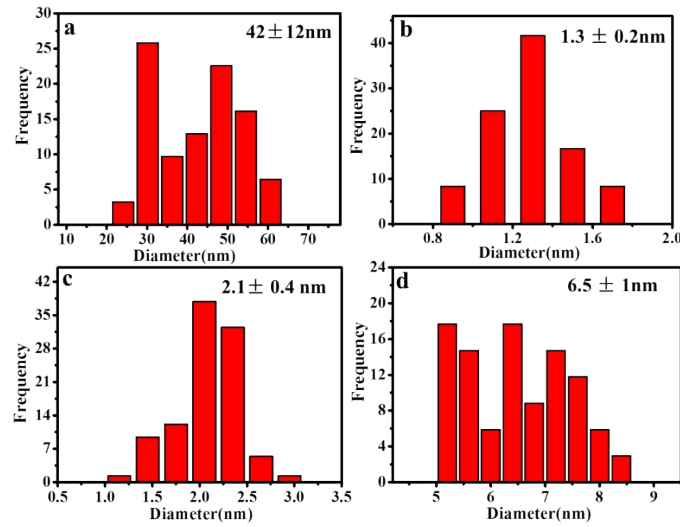

Fig. S5 Micelle (a) and Au particle (b-d) size distribution histograms of the Au@P1 prepared at different MRs of 1/30 (a), 1/10 (b), 1/5 (c) and 1/2 (d).

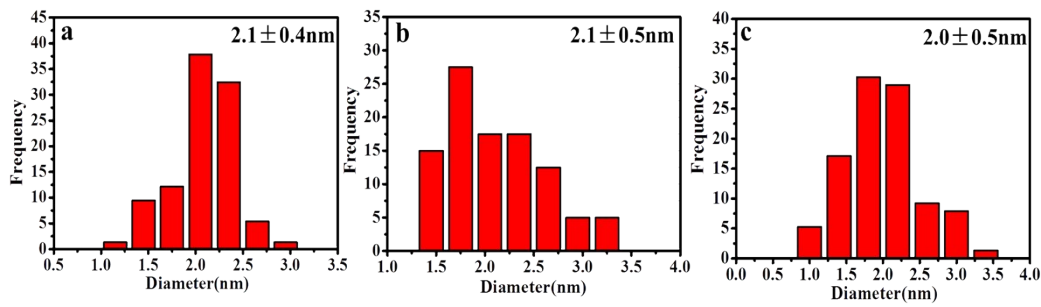

Fig. S6 Au particle size distribution histograms of the Au NPs@P1 (a), Au NPs@P2 (b), Au NPs@P2 (c) with same MR (1/5).

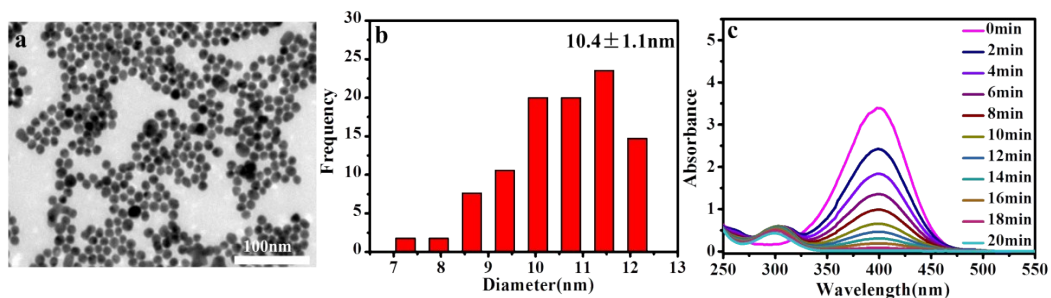

Fig. S7 TEM image (a) and diameter distribution histogram (b) of Au NPs@citrate. Time-dependent UV-vis spectra (c) of 4-NP catalyzed using Au NPs synthesized by citrate reduction. 3 mL of 0.125 mM 4-NP, 20  $\mu$ L of 173  $\mu$ M Au NPs as catalyst and 400  $\mu$ L of 0.22 M NaBH<sub>4</sub> were used for the reduction of 4-NP.

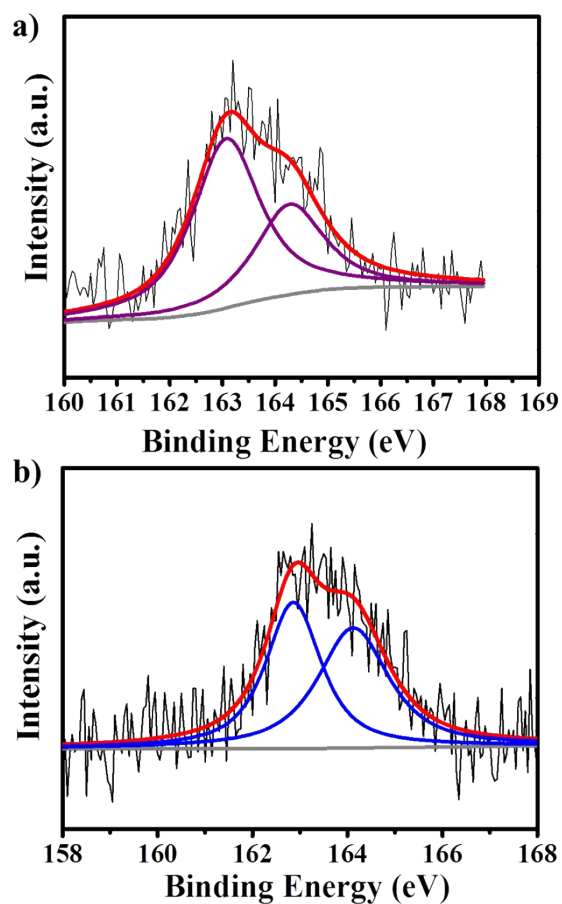

Fig. S8 Sulfur 2p XPS spectra of P1 (a), Au NPs @P1 (MR=1/2) (b).

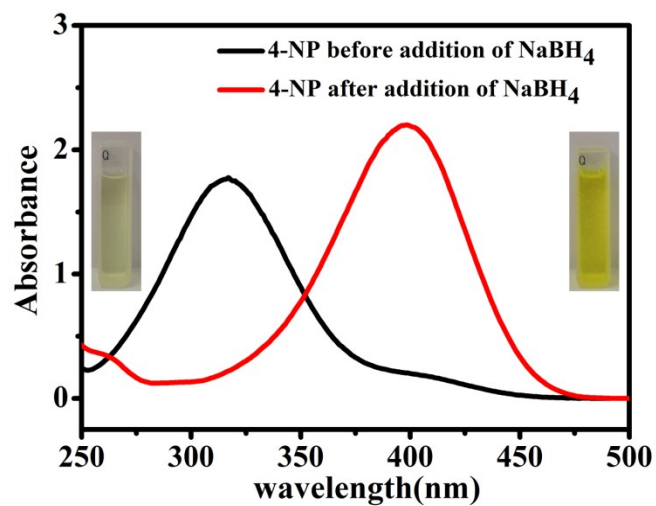

Fig. S9 UV-vis spectra of 4-nitrophenol solution with Au NPs@P1 (MR=1/2) before and after the addition of NaBH<sub>4</sub>.

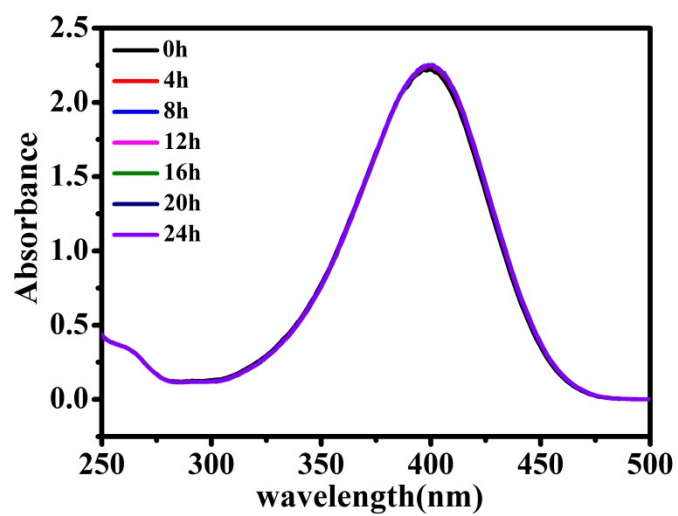

Fig. S10 UV-vis spectra of 4-nitrophenol solution with NaBH<sub>4</sub> without Au NPs @P1 catalyst.

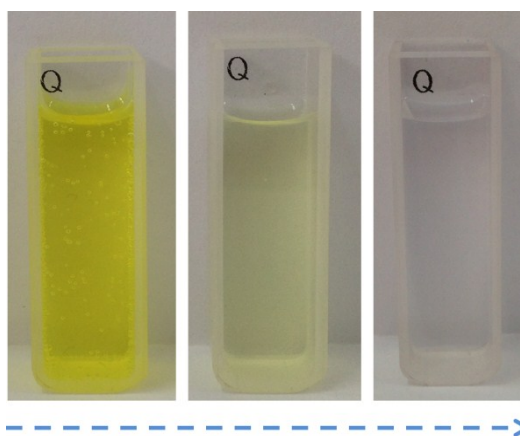

Fig. S11 Color change from yellow to colorless for 4-nitrophenol solution with NaBH<sub>4</sub> using Au NPs @P1 as catalyst.
